1     **Paper-and-pencil questionnaires analysis: a new automated technique to**  
2                                   **reduce analysis time and errors.**

3     Clovis Chabert<sup>1</sup>, Aurélie Collado<sup>1</sup>, Boris Cheval<sup>2</sup>, Olivier Hue<sup>1</sup>

4

5     <sup>1</sup> Laboratory “Adaptations au Climat Tropical, Exercice et Santé” (ACTES; EA 3596), French  
6     West Indies University, Pointe-à- Pitre, Guadeloupe, France.

7     <sup>2</sup> Swiss NCCR “LIVES - Overcoming Vulnerability: Life Course Perspectives”, University of  
8     Geneva, Switzerland.

9

10    Corresponding author:

11    Dr Clovis CHABERT, Laboratoire Adaptations au Climat Tropical, Exercice et Santé  
12    (ACTES ;EA 3596), Université des Antilles, BP 250, Campus de Fouillole, 97157 Pointe-à-  
13    Pitre Cedex, Guadeloupe, France.

14    **Tel.:** +33 590 893 172;     **Fax:** +33 590 484 179;     **email:** clovis.chabert@gmail.com

15

16

## Abstract

17 **Background and Objective:** Questionnaires are essential tools in many scientific fields,  
18 including health and medicine. However, the analysis of paper-and-pencil questionnaires is  
19 time consuming, source of errors and expensive, limiting its use in large cohort studies.  
20 Computer-based questionnaires might be a valuable alternative but they may introduce bias,  
21 especially for sensitive questions, and they require programming skills. The aim of this study  
22 is to develop a reliable and adaptable open-source technique (i.e. LightQuest) to automatically  
23 analyse various types of scanned paper-and-pencil questionnaires with closed questions,  
24 including those with inverted scale.

25 **Methods:** To evaluate the usefulness of LightQuest, the time needed for 7 experimenters for  
26 manually code 10 sets of 4 frequently used questionnaires and the number of errors (i.e.  
27 reliability) were compared with the time and errors their made using LightQuest.

28 **Results:** LightQuest was twice as fast as the manual analysis, even though the time to create  
29 the reference model was taken into account (933s vs. 1935s,  $t(2)=8.81$ ,  $p<0.001$ ). Without  
30 model creation, the reduced analysis time was more pronounced, with an average of  
31  $2.77\text{s.question}^{-1}$  for the manual technique versus  $0.55\text{s.question}^{-1}$  for LightQuest ( $t(2)=22.5$ ,  
32  $p<0.001$ ). Moreover, during correction of the 5180 questions performed by the 7  
33 experimenters, LightQuest made a total of 2 errors versus 46 with the manual technique  
34 ( $q(2)=4.53$ ,  $p<0.05$ ).

35 **Conclusion:** LightQuest demonstrated clear superiority both in terms of time and reliability.  
36 The script of this first open-source technique, which does not require programming skills, is  
37 downloadable in supplemental data and may become an asset for all studies using  
38 questionnaires.

39 **Keywords:** Open-source technique; Psychometric; Computerization; Closed-ended survey

40 **Abbreviations:**

41 AF : Automatic with Feedback

42 AnF: Automatic with no Feedback

43 GIGO: Garbage In/Garbage Out

44 MCQ: multiple choice question

45 PANAS: Positive and Negative Affect Schedule

46 POMS: Profile of Mood States

47 RSES: Rosenberg Self-Esteem Scale

48 STAI: State-Trait Anxiety Inventory

49

50

51

## 1 Introduction

52

53

54

55

56

57

58

59

60

61

62

63

64

65

66

Questionnaires are ubiquitous in scientific fields ranging from psychology to epidemiology. They are used to assess numerous psychological health indicators in specific contexts, such as clinical care, as well as in more general contexts, such as epidemiological longitudinal follow-up. According to the Medline database, the keyword “questionnaire” appeared in 74,062 studies in 2016, corresponding to more than 5.8% of the total publications of that year. The occurrence of this keyword has increased over 10-fold in the past 50 years (0.51% of total publications in 1966), clearly indicating that the questionnaire has become an unavoidable tool in human research. However, their analysis is very time-consuming, especially in large cohort studies [1], and is a repetitive cognitively demanding task that is likely to generate errors despite the experimenter’s high degree of attention [2]. Previous studies, showed that almost all the spreadsheet studied showed errors despite great diversity in computerization methodology, and a visual corrections by experimenters [3, 4]. This introduce the concept of Garbage In/Garbage Out (GIGO), which express that the errors performed during the computerization of the data in spreadsheet software (i.e. garbage in) may lead to incorrect statistical analysis results (i.e. garbage out).

67

68

69

70

71

72

73

74

75

To decrease the errors from electronic transcription [4] and increase processing efficiency and reliability, computer-based versions of questionnaires have been developed [5-7]. Over the past 30 years, the development of communication tools and the computerization of results analysis have enabled large multi-centre studies that include thousands of subjects. However, computer-based questionnaires generally require strong programming skills; they may reduce the data quality due to the cognitive burden, the “yes” bias, the population recruitment [8, 9], and the time to computerization must be considered [1]. They may also introduce bias in specific populations such as adolescent cohorts, due to alteration of social inhibition [10], or elderly cohorts, who may be unfamiliar with computer use and therefore

76 apprehensive [11]. Thus, computer-based questionnaires seem to distort results through  
77 disinhibition and a modification in social desirability [12, 13]. Furthermore, the differences in  
78 the results obtained with paper-and-pencil and computer-based questionnaires appear to be  
79 more pronounced for investigations seeking sensitive information (e.g. drugs, risky  
80 behaviours [14]), although several studies have shown that in some populations and under  
81 some circumstances, these two types of questionnaire do not produce different results [15,  
82 16]. It should also be noted that computer-based questionnaires present disadvantages  
83 compared with paper-and-pencil questionnaires, notably in field experiments that require  
84 more organization and means. For example, for outdoor experiments a sufficient number of  
85 computers and an adequate power supply must be available, and in austere environments (e.g.  
86 rain, dust, low/high temperatures) computer fragility becomes an issue. Not least, most  
87 questionnaires were initially validated in paper format.

88 Overall, the automated analysis of paper-and-pencil questionnaires seems to be an  
89 interesting alternative cumulating both the advantages of computer-based questionnaires (i.e.  
90 time efficiency and error reduction) and paper-and-pencil questionnaires (i.e. logistics, cost,  
91 ecological task). To our knowledge, a few automated systems exist, but they have been  
92 designed only to correct multiple choice question (MCQ) tests and are not very adaptable as  
93 they have not been provided in an open source format [17, 18]. Several companies sell  
94 systems for automated analysis of paper-and-pencil questionnaires, but they are expensive and  
95 mainly destined for MCQ analysis in an educational context (e.g. OMR software or Exatech  
96 QCM).

97 Thus, the aim of this work was to develop an adaptable open source software to  
98 automatically analyse digitalized paper-and-pencil questionnaires with closed questions. The  
99 reliability (i.e. the number of errors) and efficiency (i.e. analysis time) of the technique were  
100 compared with the manual technique by analysing 4 frequently used questionnaires.

101

102

## 2 Material and Methods

### 103 2.1 Experimenters

104 Seven experimenters ( $29 \pm 4$  years old) with  $5.9 \pm 2$  years of university education were  
105 recruited to analyse the questionnaires. Each experimenter analysed all the questionnaires  
106 manually and using the software in randomized order.

### 107 2.2 Analysed questionnaires

108 To compare the manual analysis with the software analysis, we used 10 sets of 4 well-  
109 known questionnaires, corresponding to a total of 740 questions. The questionnaires were: the  
110 Positive and Negative Affect Schedule (PANAS; [19]), the State-Trait Anxiety Inventory  
111 (STAI; [20]), the Profile of Mood States (POMS; [21, 22]), and the Rosenberg Self-Esteem  
112 Scale (RSES; [23, 24]). These questionnaires were chosen because they have been frequently  
113 used since their validation (respectively cited 27,562 times, 7,164 times, 9,659 times and  
114 1,364 times) and, despite their lifespan, they are still used in many recent studies [25-28].  
115 Although the RSES has been used less often than the others, its reversed scoring of some  
116 items makes it interesting for automated analysis because the reversed valence may increase  
117 the cognitive processes needed for analysis, which probably leads to increased analysis time  
118 and number of errors. The PANAS and the STAI are 20-item questionnaires with respectively  
119 5 (ranging from 1 to 5) and 4 (ranging from 1 to 4) possible answers. The POMS consists of  
120 24 questions on a 5-point scale ranging from 0 to 4. The RSES is a 10-item questionnaire with  
121 4 possible answers (ranging from 1 to 4) and reversed valence for questions 2, 5, 6, 8 and 9.

### 122 2.3 Manual analysis

123 The 10 sets of each questionnaire were analysed in one session with a pause between  
124 the questionnaire types. The analysis time (in seconds) for each questionnaire corresponded to

125 the time from the first question of the first questionnaire to the completion of answer  
126 digitalization of the 10<sup>th</sup> questionnaire in a pre-established Excel matrix.

## 127 **2.4 Automated analysis**

128 The first step before starting the LightQuest script is to digitize an empty  
129 questionnaire, which will be used to create the model file, and the questionnaires to be  
130 analysed. For this study, digitization was performed with the charger of an ineo+554e printer  
131 (DEVELOP, Langenhagen, Germany), enabling us to copy all questionnaires in a single  
132 session. With this tool, the digitization time is approximately 1 second per questionnaire.

133 The automated analysis (i.e. LightQuest) has two main steps. First, the user has to  
134 create a model of the questionnaire to be processed (Figure 1A). In this step, which uses  
135 LightQuest\_Model.m software for the analysis of a blank questionnaire, a model file is  
136 created and can be used every time the experimenter re-uses the questionnaire. Once this  
137 script is launched, a dialog box appears for the configuration of the questionnaire variables:  
138 number of items, response scale, presence of inverted items, and number of targets. Targets  
139 are the black rectangles visible on the questionnaire (see example of questionnaires used in  
140 this study in supplemental data “LightQuest.zip”) used for correcting the displacement (first  
141 target) and rotation (first and second targets) of the questionnaire, which may occur during  
142 digitization. Targets must be at the same height and have the same size (for this study we used  
143 0.5cm x 0.5cm) and should be drawn on the questionnaire before printing. Once the user  
144 clicks on “OK”, the software asks the user to determine the approximate areas of the first and  
145 second targets, as described in “instructions for users” file (see supplemental data  
146 “LightQuest.zip”). The user then has to select all the questionnaire answers areas in one time  
147 to zoom and facilitate the selection of the question-by-question answer area. To obtain the  
148 best results, the selection rectangle must be focused on the centre of the answer area, with  
149 blank space all around. To help the user, the number of answers currently being parameterized

150 is displayed at the top of the window. After selection of the answer area for the last question,  
151 a dialog box appears for the correction of the areas that the user estimates as wrongly selected.  
152 To finish creating the model, the user then simply clicks on “OK”.

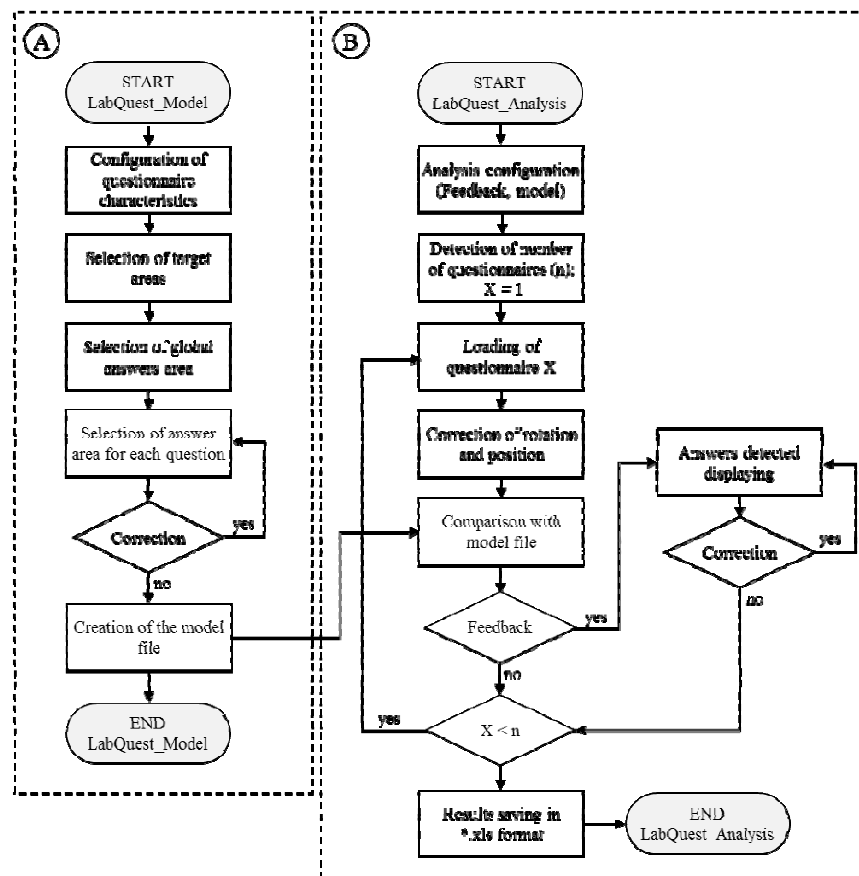

153

154 *Figure 1: Main steps of LightQuest processing for questionnaire model creation (A) and*  
155 *analysis by experimenters of the completed questionnaires (B).*

156 Second, the analysis of the questionnaires is performed by the LightQuest\_Analysis.m  
157 file (Figure 1B). Once the script is run, a dialog box appears so that the appropriate model file  
158 can be selected to analyse the questionnaires, as well as the feedback level wanted during the  
159 analysis. If the feedback selected is “Yes”, each questionnaire is displayed with the detected  
160 answers, and the user can quickly verify and correct the analysis with an interactive interface  
161 in the case of multiple answers or no answer to a question (i.e: AF). Otherwise, selecting



162 “No” means that the Excel matrix with the detected answers is directly generated by the script  
163 without steps of user verification and correction (i.e. AnF). For each participant of the study, 3  
164 columns were implemented in the Excel file and saved in the Results folder. The first column  
165 corresponds to the detected answers, the second to the value attributed to the answer during  
166 model creation, and the third to the number of answers detected for each question. If inverted  
167 items are present in the questionnaire, the script automatically corrects the value attributed to  
168 the answer, in accordance with the configuration established during model creation. For ease  
169 of use, an explanation file describing the step by step use of the software is available in  
170 supplemental data (LightQuest.zip).

## 171 **2.5 Statistical analysis**

172 The analysis time, detected answers, and number of errors were collected for each  
173 technique and questionnaire. Analysis time (in seconds) per questionnaire and per question  
174 were assessed with an omnibus 2-way ANOVA according to the questionnaire (PANAS,  
175 STAI, RSES, PANAS) and technique (manually, automatically with feedback: AF to directly  
176 validate and correct the detected answers, and automatically with no feedback: AnF). To  
177 perform the omnibus 2-way ANOVA, data were corrected with Box-Cox transformation [29]  
178 to fit with normality law (Shapiro-Wilk test) and homogeneity (Levene test). Holm-Sidak  
179 *post-hoc* tests were performed to determine the detected effects. Because results did not show  
180 significant differences between questionnaires (results not shown), statistical analysis of the  
181 total number of errors with each technique (Figure 3) was performed with a Kruskal-Wallis 1-  
182 way ANOVA on ranks (technique factor), followed by a Tukey *post-hoc* test.

183

184

### 3 Results

#### 185 3.1 Comparison of analysis times

186 Figure 2A presents the mean time taken by the 7 experimenters to analyse 10 copies of  
187 the PANAS, POMS, RSES and POMS questionnaires with the 3 techniques. Statistical  
188 analysis showed a main effect of both technique ( $F(2, 72) = 125.26, p < 0.001$ , partial  $\eta^2 =$   
189  $0.74$ ) and questionnaire ( $F(3, 83) = 4.66, p = 0.005$ , partial  $\eta^2 = 0.041$ ), with no significant  
190 interaction between these 2 factors ( $F(6, 83) = 4.9e^{-4}, p = 0.812$ , partial  $\eta^2 = 8.7e^{-3}$ ).

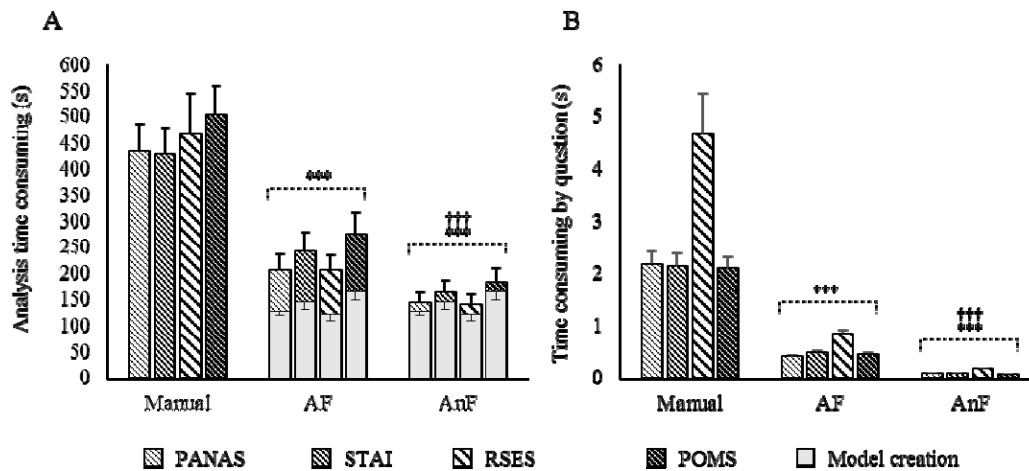

191

192 *Figure 2: Time needed for 10 questionnaires analysis (A) or for one question (B), according*  
193 *to the technique used. Mean±SEM; n = 7. AF: automatic + feedback; AnF: automatic with no*  
194 *feedback; PANAS: Positive and Negative Affect Schedule; STAI: State-Trait Anxiety*  
195 *Inventory; POMS: Profile of Mood States; RSES: Rosenberg Self-Esteem Scale. \*\*\*: diff.*  
196 *from manual analysis (p<0.001); †††: diff. from AF (p<0.001).*

197

198 Comparison of manual *versus* AF and AnF showed a significant decrease in analysis  
199 time between 49% and 66% (manual *vs.* AF:  $t(2) = 8.81, p < 0.001$ ; manual *vs.* AnF:  $t(2) =$   
200  $15.79, p < 0.001$ ). Comparison of AF and AnF revealed a significant 32% decrease in analysis

201 time by technique: the time in AF condition was significantly longer than the time in AnF  
202 condition ( $t(2) = 6.98, p < 0.001$ ). *Post-hoc* analysis of the questionnaire factor showed a  
203 significant difference between POMS (24 questions) *versus* the RSES (10 questions) and  
204 PANAS (20 questions) questionnaires (respectively  $t(3) = 3.35, p = 0.008$ ; and  $t(3) = 3.06, p =$   
205  $0.015$ ).

206 Analysis time in relation to the number of questions in each questionnaire (Figure 2B)  
207 also showed a main effect of technique ( $F(2, 72) = 1083.42, p < 0.001$ , partial  $\eta^2 = 0.92$ ) and  
208 questionnaire ( $F(3, 83) = 41.69, p < 0.001$ , partial  $\eta^2 = 0.053$ ), with no significant interaction  
209 between these 2 factors ( $F(6, 83) = 0.57, p = 0.756$ , partial  $\eta^2 = 1.44e^{-3}$ ). Thus, the manual  
210 technique was 79% and 96% significantly slower than AF and AnF (respectively  $t(2) = 22.50,$   
211  $p < 0.001$  and  $t(2) = 46.54, p < 0.001$ ). AF and AnF were statistically different ( $t(2) = 24.03, p$   
212  $< 0.001$ ), with the analysis time reduced over 80% with AnF compared with AF. Analysis of  
213 the questionnaire factor revealed that processing RSES was significantly longer than  
214 processing PANAS, POMS and STAI (respectively  $t(3) = 9.42, p < 0.001$ ;  $t(3) = 9.39, p <$   
215  $0.001$ ; and  $t(3) = 8.46, p < 0.001$ ).

### 216 **3.2 Reliability of the analysis techniques**

217 To test the reliability of the analysis techniques, we compared the total number of  
218 errors made by each experimenter when they corrected the questionnaires manually and with  
219 AF and AnF (Figure 3).

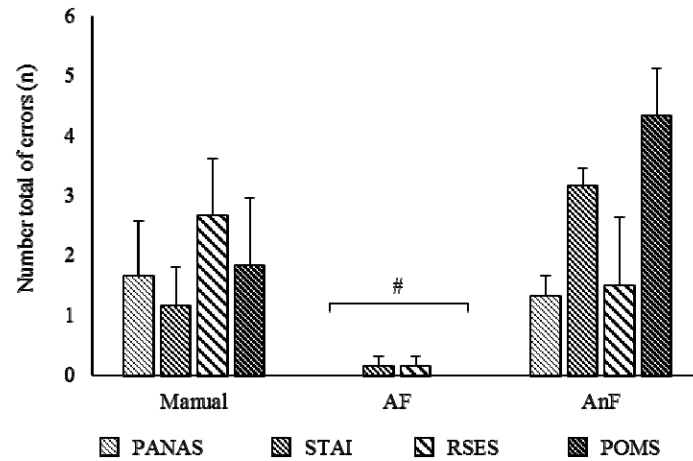

220

221 *Figure 3: Number of errors made by experimenters during analysis with the techniques.*  
222 *Mean±SEM; n = 7. AF: automatic + feedback; AnF: automatic with no feedback; PANAS:*  
223 *Positive and Negative Affect Schedule; STAI: State-Trait Anxiety Inventory; POMS: Profile of*  
224 *Mood States; RSES: Rosenberg Self-Esteem Scale. #: diff. from manual and AnF technique*  
225 *(p<0.05).*

226

227 A non-parametric 1-way ANOVA performed on the questionnaire factor found a  
228 significant difference ( $H(2) = 30.84, p < 0.001$ ). Tukey *post-hoc* analysis showed that the  
229 number of errors with AF was significantly lower than with the manual (2 vs. 46 errors,  $q(2) =$   
230  $4.528, p < 0.05$ ) and AnF (2 vs. 67 errors,  $q(2) = 7.16, p < 0.05$ ) techniques. No significant  
231 difference was observed between the AnF and manual techniques (67 vs. 46 errors,  $q(2) =$   
232  $2.63$ ).

233

234

## 4 Discussion

### 235 4.1 Main findings

236 Questionnaires are unavoidable tools in many research fields to better characterize  
237 study populations or evaluate psychological parameters, quality of life, fatigue, and so on.  
238 However, analysing a large number of questionnaires is expensive (if subcontracted) or very  
239 time-consuming, and mistakes are not uncommon. This study presents an efficient and  
240 reliable automated technique to analyse questionnaires with Matlab scripts (downloadable in  
241 supplemental data). Our results showed that the technique significantly decreased the number  
242 of errors (AF) and the time needed (AF and AnF) to process 4 widely used questionnaires,  
243 suggesting that it is a potential asset in all studies using paper-and-pencil questionnaires.  
244 Furthermore, this technique enables users to configure new questionnaires, thereby making it  
245 highly adaptable.

### 246 4.2 Comparison with manual technique

247 The automated technique with user feedback (AF) reduced the time needed to  
248 manually analyse 10 sets of 4 questionnaires (1835s vs. 933s) by half and appeared to be time-  
249 efficient from the 5<sup>th</sup> questionnaire. At the 20<sup>th</sup> questionnaire, the AF technique was 9 to  
250 11min faster and saved effective-time analysis work. Furthermore, this benefit included the  
251 time needed to create a model, corresponding to approximately 60% of the processing time,  
252 whereas the model can be re-used as long as the questionnaire is not changed. Thus, once the  
253 model is created, the technique is at least 4.4 to 5.5 times faster than manual analysis, and this  
254 is without taking into account the decreased efficiency in analysis due to the experimenter's  
255 fatigue during a repetitive task [30].

256 In addition to the time saved, the automated technique with feedback sharply  
257 decreased the number of errors. Indeed, the number of errors occurring during analysis was  
258 divided by 23 for the AF technique compared with the manual analysis. For the RSES, the

259 number of errors with manual analysis was identical to those for the other questionnaires,  
260 despite differences in the number of questions (only 10 for RSES vs. 20-24 for the others).  
261 Thus, the number of errors per question was doubled for the RSES, probably due to the  
262 reverse-coded questions that increased the task complexity. With this technique, inverted  
263 items are configured during model creation and are automatically taken into account by the  
264 script during analysis.

### 265 **4.3 Interest of the automatic with no feedback (AnF) option**

266 An option was also developed to directly generate the results table without user  
267 feedback and correction (AnF). With this option, computer processing took less than 2s per  
268 questionnaire, whereas the AF technique needed 11s. However, using this option resulted in a  
269 gain of only 1-2min in analysis time for each set of 10 questionnaires and sharply increased  
270 the total number of errors compared with AF (2 vs. 67 errors for 280 questionnaires).  
271 Furthermore, although the difference appeared to be non-significant in this study, the number  
272 of errors was multiplied by almost 1.5 compared with manual analysis (67 errors vs. 46 for  
273 280 questionnaires). Thus, we recommend using this option only in very specific situations  
274 after careful verification of the model quality. A post-analysis correction is also possible  
275 directly in the Excel table generated by the script, facilitated by the annotation of the number  
276 of answers detected for each question in the third column. Nonetheless, this correction mode  
277 is not advisable because it appears to be more time-consuming than the user interface we  
278 developed to directly validate the software analysis (data not shown). Interestingly, the low  
279 number of errors obtained with the model created by beginners shows the ease of handling our  
280 technique (experimenters have only one created model to become used to).

### 281 **4.4 Strengths and weaknesses**

282 To our knowledge, LightQuest is the first open source script available for the analysis  
283 of paper-and-pencil research questionnaires, and the possibility of creating new model files

284 makes it an usable tool for all existing and future questionnaires. Furthermore, LightQuest's  
285 graphic interface is user-friendly, decreasing the cognitive load and thereby decreasing the  
286 questionnaire analysis time and the number of errors. LightQuest appears to be particularly  
287 efficient for analysing questionnaires with an inverted scale, probably because it requires  
288 fewer cognitive resources compared with manual analysis. Last, the 2 black targets help to  
289 correct the rotation and displacement of the questionnaire during computerization, which  
290 makes LightQuest functional with all printer chargers or commercial scanners.

291 However, to maintain sufficient picture quality, the questionnaires need to be printed  
292 from a computer and photocopiers should not be used. For already completed questionnaires,  
293 the absence of 2 black targets reduces LightQuest's accuracy. Nonetheless, an option is  
294 available (i.e. Black target = 0) to analyse questionnaires without these targets, but the low  
295 accuracy implies more manual corrections by the LightQuest user. The AnF option decreases  
296 the analysis time but increases the number of errors. However, these errors are mainly  
297 because LightQuest is unable to identify mistakes made by study participants (e.g. 42 cross-  
298 outs out of the 160 questionnaires corrected during this study) and the software makes  
299 artefactual detections when participants exceed the response box. Thus, this option is only  
300 recommended for questionnaires with considerable distance between answer areas and after  
301 visual validation of the created model quality. Last, LightQuest is not encoded to analyse  
302 visual analogue scales, but this function could easily be implemented in its open source code  
303 by a user with programming skills.

## 304 **5 Conclusion**

305 The open source script proposed in this study considerably reduces the analysis time  
306 and the number of errors on paper-and-pencil questionnaires. Thus, using LightQuest for  
307 questionnaires based studies may reduce cost, allow inclusion of larger cohorts and decrease

308 the errors of interpretation due to mistake during the manual electronic transcription of data.  
309 LightQuest is adaptable to any questionnaire with closed questions by adding black targets,  
310 and no programming skills are required. To our knowledge, this technique is the only one  
311 offering automated analysis of research questionnaires, which is why it could become an asset  
312 for large cohort studies in many fields of investigation.

313

314

### **Acknowledgement**

315 This project was supported by a « Programme Opérationnel - Fonds Européen de  
316 Développement Régional » (PO-FEDER) grant. B.C. is supported by an Ambizione grant  
317 (PZ00P1\_180040) from the Swiss National Science Foundation (SNSF).

318

319

### **Author Contribution Statement**

320 C.C. and A.C. participated equally in the design, measurement, analysis and redaction  
321 of this work. B.C. and O.H. contributed to the data analysis and the redaction of this work.

322

### **Conflict of interest**

323 No conflict of interest is declared by the authors.



324

## 6 References

- 325 1. Uhlig CE, Seitz B, Eter N, Promesberger J, Busse H. Efficiencies of Internet-based digital and paper-  
326 based scientific surveys and the estimated costs and time for different-sized cohorts. *PloS*  
327 *one* 2014;**9**(10):e108441 doi: 10.1371/journal.pone.0108441[published Online First: Epub  
328 Date]].
- 329 2. Monk TH, Leng VC. Time of day effects in simple repetitive tasks: some possible mechanisms. *Acta*  
330 *Psychologica* 1982;**51**(3):207-21
- 331 3. Panko RR. What we know about spreadsheet errors. *Journal of Organizational and End User*  
332 *Computing (JOEUC)* 1998;**10**(2):15-21
- 333 4. Wahi MM, Parks DV, Skeate RC, Goldin SB. Reducing errors from the electronic transcription of  
334 data collected on paper forms: a research data case study. *J Am Med Inform Assoc*  
335 2008;**15**(3):386-9 doi: 10.1197/jamia.M2381[published Online First: Epub Date]].
- 336 5. Vandelanotte C, Matthys C, De Bourdeaudhuij I. Reliability and validity of a computerized  
337 questionnaire to measure fat intake in Belgium. *Nutrition Research* 2004;**24**(8):621-31
- 338 6. Matton L, Wijndaele K, Duvigneaud N, et al. Reliability and validity of the Flemish Physical Activity  
339 Computerized Questionnaire in adults. *Research quarterly for exercise and sport*  
340 2007;**78**(4):293-306
- 341 7. Vandelanotte C, De Bourdeaudhuij I, Philippaerts R, Sjöström M, Sallis J. Reliability and validity of a  
342 computerized and Dutch version of the International Physical Activity Questionnaire (IPAQ).  
343 *Journal of physical activity and health* 2005;**2**(1):63-75
- 344 8. Bowling A. Mode of questionnaire administration can have serious effects on data quality. *Journal*  
345 *of public health* 2005;**27**(3):281-91
- 346 9. Hardre PL, Crowson HM, Xie K, Ly C. Testing differential effects of computer-based, web-based and  
347 paper-based administration of questionnaire research instruments. *British Journal of*  
348 *Educational Technology* 2007;**38**(1):5-22
- 349 10. Supple AJ, Aquilino WS, Wright DL. Collecting sensitive self-report data with laptop computers:  
350 Impact on the response tendencies of adolescents in a home interview. *Journal of Research*  
351 *on Adolescence* 1999;**9**(4):467-88
- 352 11. Vaportzis E, Clausen MG, Gow AJ. Older Adults Perceptions of Technology and Barriers to  
353 Interacting with Tablet Computers: A Focus Group Study. *Frontiers in psychology*  
354 2017;**8**:1687 doi: 10.3389/fpsyg.2017.01687[published Online First: Epub Date]].
- 355 12. Booth-Kewley S, Larson GE, Miyoshi DK. Social desirability effects on computerized and paper-  
356 and-pencil questionnaires. *Computers in Human Behavior* 2007;**23**(1):463-77
- 357 13. Weigold A, Weigold IK, Russell EJ. Examination of the equivalence of self-report survey-based  
358 paper-and-pencil and internet data collection methods. *Psychological methods* 2013;**18**(1):53
- 359 14. Wright DL, Aquilino WS, Supple AJ. A comparison of computer-assisted and paper-and-pencil self-  
360 administered questionnaires in a survey on smoking, alcohol, and drug use. *Public Opinion*  
361 *Quarterly* 1998:331-53
- 362 15. Knapp H, Kirk SA. Using pencil and paper, Internet and touch-tone phones for self-administered  
363 surveys: does methodology matter? *Computers in Human Behavior* 2003;**19**(1):117-34
- 364 16. Gosling SD, Vazire S, Srivastava S, John OP. Should we trust web-based studies? A comparative  
365 analysis of six preconceptions about internet questionnaires. *American psychologist*  
366 2004;**59**(2):93
- 367 17. A simple system for automatic exam scoring using optical markup reader. Second Balkan IFAC  
368 International Symposium; 2000.
- 369 18. China RT, de Assis Zampiroli F, de Oliveira Neves RP, Quilici-Gonzalez JA. An application for  
370 automatic multiple-choice test grading on android. *Revista Brasileira de Iniciação Científica*  
371 2016;**3**(2)

- 372 19. Crawford JR, Henry JD. The Positive and Negative Affect Schedule (PANAS): Construct validity,  
373 measurement properties and normative data in a large non-clinical sample. *British journal of*  
374 *clinical psychology* 2004;**43**(3):245-65
- 375 20. Spielberger CD. Manual for the State-Trait Anxiety Inventory STAI (form Y)(" self-evaluation  
376 questionnaire"). 1983
- 377 21. McNair DM, Lorr M, Droppleman LF. *Profile of mood states*: Educational and industrial testing  
378 service San Diego, CA, 1992.
- 379 22. McNair DM. *Manual profile of mood states*: Educational & Industrial testing service, 1971.
- 380 23. Rosenberg M. Rosenberg self-esteem scale (RSE). Acceptance and commitment therapy.  
381 Measures package 1965;**61**:52
- 382 24. Silber E, Tippett JS. Self-esteem: Clinical assessment and measurement validation. *Psychological*  
383 *reports* 1965;**16**(3\_suppl):1017-71
- 384 25. Seib-Pfeifer L-E, Pugnaghi G, Beauducel A, Leue A. On the replication of factor structures of the  
385 Positive and Negative Affect Schedule (PANAS). *Personality and Individual Differences*  
386 2017;**107**:201-07
- 387 26. Troisi A, Carola V, Gross C. GENETIC VARIATION IN THE SEROTONIN TRANSPORTER GENE  
388 INFLUENCES ADULT ATTACHMENT STYLE. *Clinical Neuropsychiatry* 2017;**14**(4)
- 389 27. Reynolds CJ, Carpenter RW, Trageser SL. Accounting for the association between BPD features  
390 and chronic pain complaints in a pain patient sample: The role of emotion dysregulation  
391 factors. *Personality Disorders: Theory, Research, and Treatment* 2018;**9**(3):284
- 392 28. Twenge JM, Carter NT, Campbell WK. Age, time period, and birth cohort differences in self-  
393 esteem: Reexamining a cohort-sequential longitudinal study. *Journal of personality and social*  
394 *psychology* 2017;**112**(5):e9
- 395 29. Box GE, Cox DR. An analysis of transformations. *Journal of the Royal Statistical Society. Series B*  
396 *(Methodological)* 1964:211-52
- 397 30. Paus T, Zatorre RJ, Hofle N, et al. Time-related changes in neural systems underlying attention  
398 and arousal during the performance of an auditory vigilance task. *Journal of cognitive*  
399 *neuroscience* 1997;**9**(3):392-408 doi: 10.1162/jocn.1997.9.3.392[published Online First: Epub  
400 Date] | .
- 401  
402  
403
